# Supplementary material for: Influence of irrigation on root zone storage capacity estimation
Source: Copernicus journal article supplement (doi:10.5194/hess-28-2313-2024), 2024-05-31
Supplement: Supplementary file 1 [file hess-28-2313-2024-supplement.pdf]

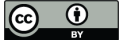

*Supplement of*

## **Influence of irrigation on root zone storage capacity estimation**

**Fransje van Oorschot et al.**

*Correspondence to:* Fransje van Oorschot ([f.vanoorschot@tudelft.nl](mailto:f.vanoorschot@tudelft.nl))

The copyright of individual parts of the supplement might differ from the article licence.

## Supplement

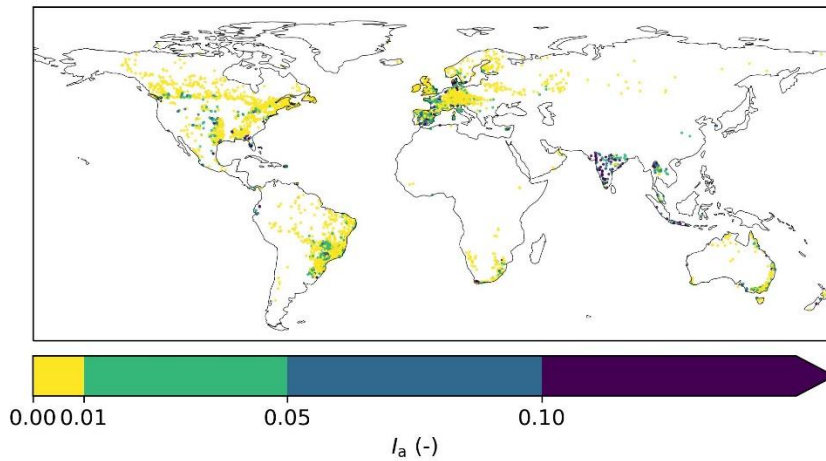

Figure S 1 Irrigated area fraction ( $I_a$ ) stratified in the four groups used in Fig. 7 with dots representing the catchment outlets (Siebert et al., 2015)

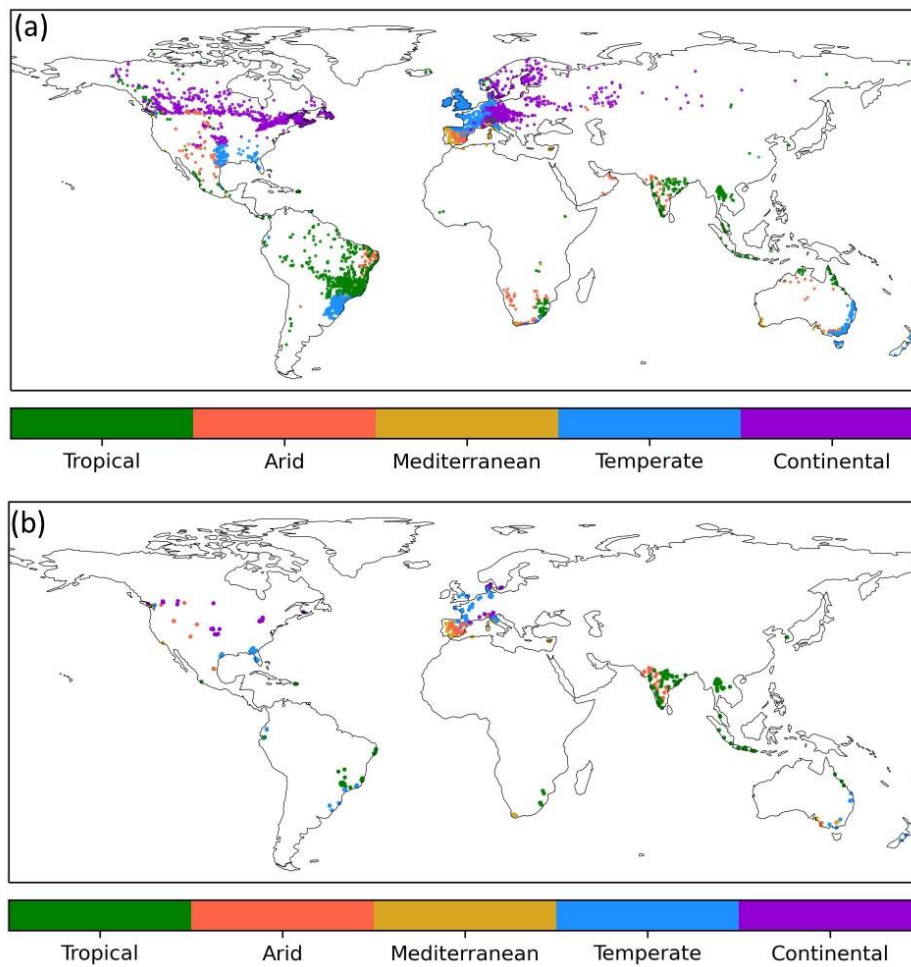

Figure S 2. Climate zone stratification used in Fig. 8b. (a) shows all study catchments and (b) catchments with  $I_a > 0.05$ . The following classification based on Köppen-Geiger is used: tropical (Af, Am, Aw), arid (BWh, BWk, BSh, BSk), temperate dry summer (Cfa, Cfb, Cfc), Mediterranean (Csa, CSb), and continental (Dfa, Dfb, Dfc, Dfd) (Beck et al., 2018).

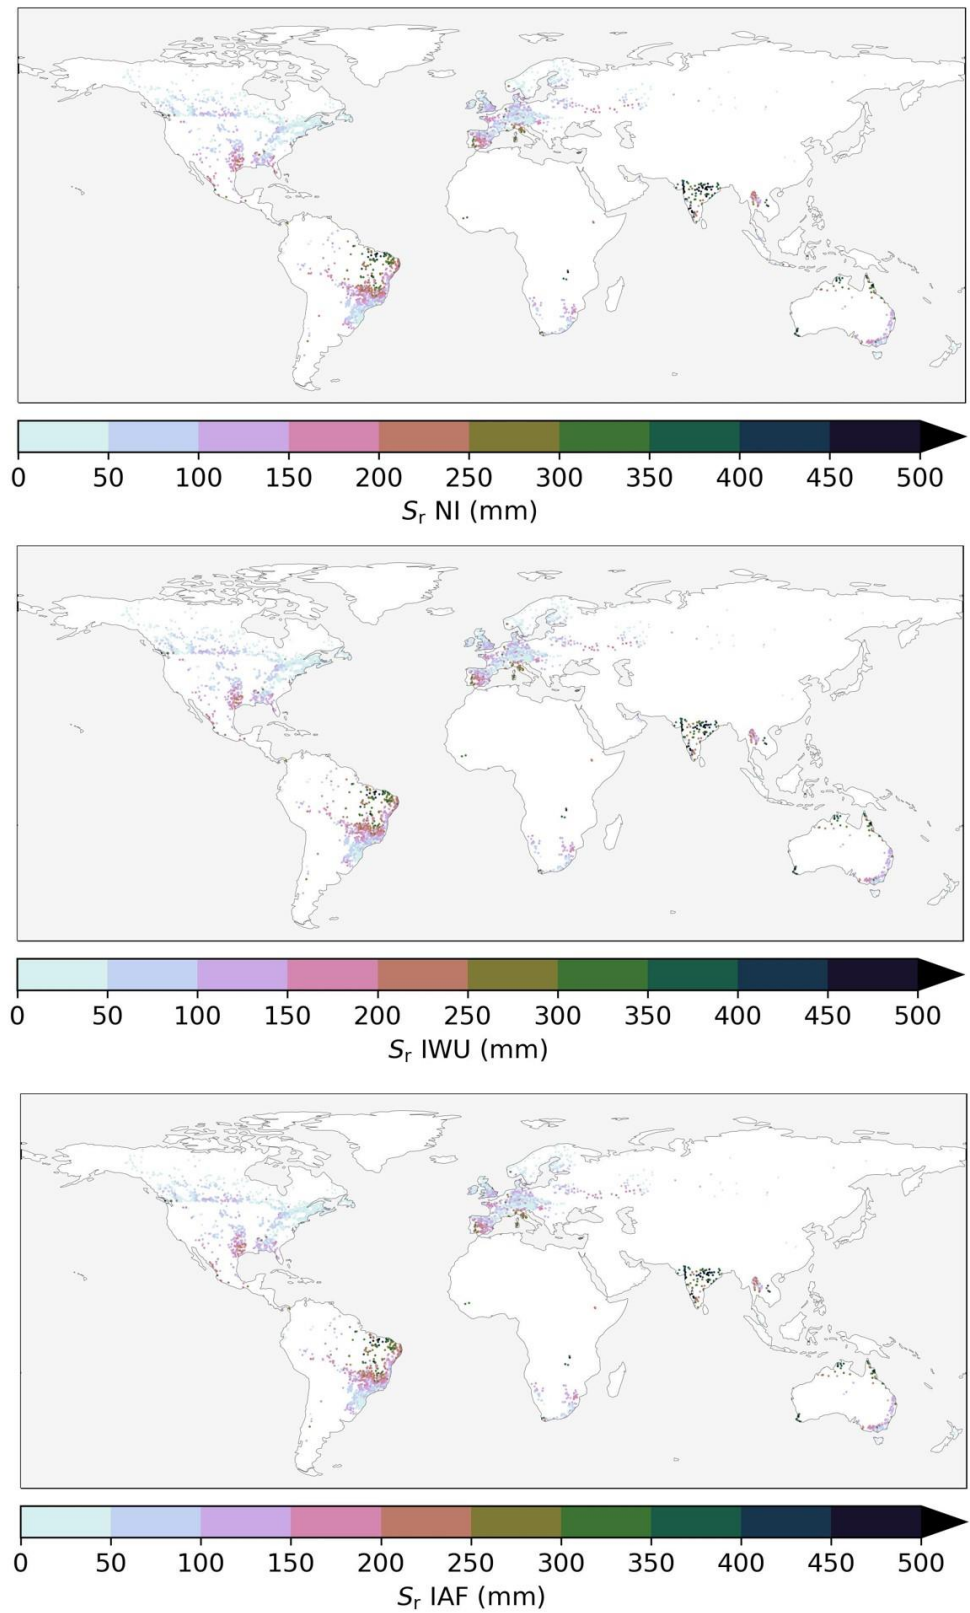

Figure S 3. Catchment  $S_r$  in mm for (a) the No Irrigation (NI) case, (b) the IWU irrigation case, and (c) the IAF irrigation case (Table 1), with dots representing catchment outlets.

$(IWU - IAF)/IAF$

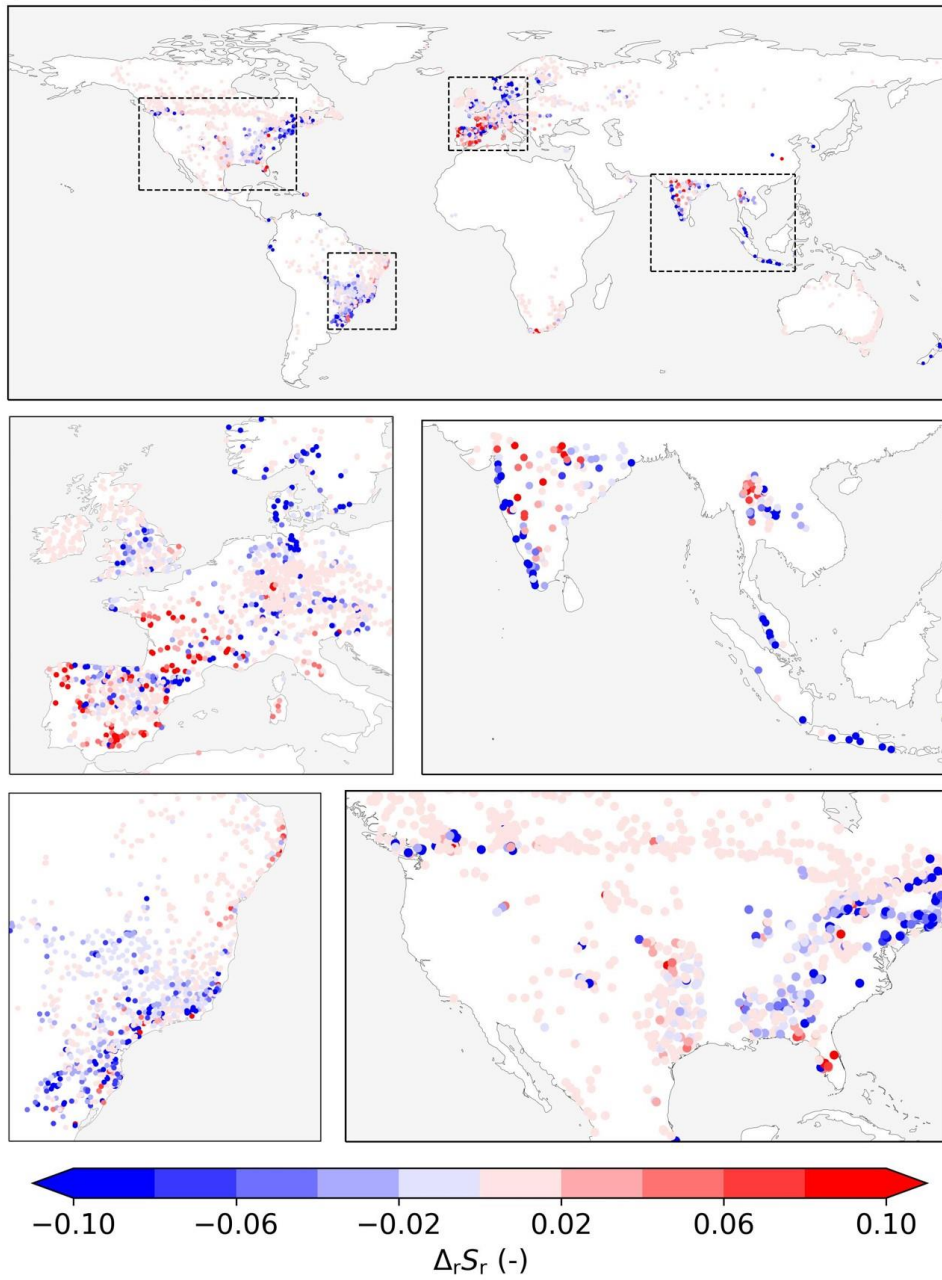

Figure S 4. Relative difference in  $S_r$  ( $\Delta_r S_r$  (-)) for IWU compared to IAF ( $(IWU-IAF)/IAF$ ). See Table 1 for details on the irrigation cases.
